# Supplementary material for: A pilot case series for concurrent validation of inertial measurement units to motion capture in individuals who use unilateral lower-limb prostheses
Source: PubMed Central journal article supplement — J Rehabil Assist Technol Eng. 2023 Jun 29;10:20556683231182322. doi: 10.1177/20556683231182322 (PMC10334000; doi:10.1177/20556683231182322), 2023-06-29
Supplement: sj-pdf-1-jrt-10.1177_20556683231182322.pdf [file sj-pdf-1-jrt-10.1177_20556683231182322.pdf]

**Supplemental Table 1: Mean IMU and Motion Capture Data**

|             |                         | Participant 1 | Participant 2 | Participant 3 | Participant 4 | Participant 5 |              |              |              |              |              |
|-------------|-------------------------|---------------|---------------|---------------|---------------|---------------|--------------|--------------|--------------|--------------|--------------|
|             |                         | IMU           | MoCap         | IMU           | MoCap         | IMU           | MoCap        | IMU          | MoCap        | IMU          | MoCap        |
|             | Double Limb Support (s) | 0.26 ± 0.01   | 0.23 ± 0.02   | 0.27 ± 0.05   | 0.26 ± 0.01   | 0.26 ± 0.01   | 0.24 ± 0.01  | 0.28 ± 0.01  | 0.26 ± 0.01  | 0.29 ± 0.01  | 0.28 ± 0.01  |
| Intact Limb | Single Limb Support (s) | 0.85 ± 0.03   | 0.82 ± 0.01   | 0.71 ± 0.09   | 0.70 ± 0.08   | 0.70 ± 0.08   | 0.72 ± 0.09  | 0.74 ± 0.01  | 0.72 ± 0.01  | 0.71 ± 0.01  | 0.70 ± 0.35  |
|             | Peak Hip Flex (°)       | 30.67 ± 3.26  | 25.85 ± 1.57  | 29.27 ± 1.69  | 28.26 ± 1.45  | 18.41 ± 2.12  | 18.36 ± 1.01 | 13.67 ± 1.06 | 15.80 ± 1.06 | 23.94 ± 1.10 | 23.31 ± 0.51 |
|             | Peak Hip Ext (°)        | 26.6 ± 3.35   | 22.85 ± 1.36  | 22.29 ± 0.19  | 27.42 ± 0.928 | 19.48 ± 1.20  | 22.45 ± 0.91 | 20.27 ± 1.16 | 18.47 ± 2.69 | 26.62 ± 1.49 | 27.33 ± 1.51 |
|             | Hip ROM (°)             | 57.32 ± 6.60  | 52.70 ± 2.82  | 45.56 ± 1.77  | 55.68 ± 0.95  | 37.93 ± 2.84  | 40.82 ± 1.83 | 33.94 ± 1.85 | 34.27 ± 3.49 | 49.95 ± 2.58 | 50.64 ± 1.82 |
|             | Peak Knee Flex (°)      | 14.53 ± 6.89  | 32.09 ± 2.05  | 51.43 ± 0.25  | 45.46 ± 3.68  | 33.29 ± 6.15  | 39.20 ± 0.61 | 36.88 ± 1.08 | 38.04 ± 0.51 | 39.27 ± 1.16 | 39.59 ± 0.77 |
|             | Peak Knee Ext (°)       | 8.70 ± 2.91   | 13.73 ± 2.73  | 25.89 ± 1.40  | 30.48 ± 0.76  | 17.31 ± 2.11  | 20.34 ± 1.12 | 20.15 ± 0.43 | 19.65 ± 1.05 | 23.08 ± 2.05 | 21.79 ± 1.68 |
|             | Knee ROM (°)            | 23.21 ± 9.69  | 45.82 ± 2.08  | 76.33 ± 1.29  | 57.96 ± 2.97  | 50.61 ± 8.11  | 59.55 ± 0.61 | 57.04 ± 1.34 | 57.69 ± 1.46 | 62.35 ± 2.24 | 61.39 ± 1.44 |
|             | Peak Ankle DF           | 19.78 ± 1.61  | 13.16 ± 7.46  | 23.36 ± 4.37  | 12.97 ± 0.17  | 10.07 ± 1.97  | 12.31 ± 0.70 | 14.79 ± 1.45 | 15.01 ± 1.45 | 13.34 ± 0.75 | 10.78 ± 0.99 |

|                 |                         |              |               |              |              |              |              |              |               |               |              |
|-----------------|-------------------------|--------------|---------------|--------------|--------------|--------------|--------------|--------------|---------------|---------------|--------------|
|                 | (°)                     |              |               |              |              |              |              | 1.1<br>6     |               |               |              |
|                 | Peak Ankle PF (°)       | 18.20 ± 1.91 | 12.10 ± 5.45  | 18.32 ± 1.39 | 28.35 ± 1.84 | 19.40 ± 2.19 | 14.47 ± 1.81 | 28.17 ± 6.33 | 23.91 ± 5.29  | 32.68 ± 1.34  | 25.08 ± 1.25 |
|                 | Ankle ROM (°)           | 37.98 ± 3.34 | 25.26 ± 12.81 | 41.68 ± 5.73 | 41.33 ± 1.77 | 29.47 ± 1.46 | 26.78 ± 2.11 | 42.97 ± 7.19 | 40.92 ± 6.75  | 46.02 ± 0.80  | 35.86 ± 0.44 |
| Prosthetic Limb | Single Limb Support (s) | 0.52 ± 0.06  | 0.56 ± 0.06   | 0.51 ± 0.33  | 0.52 ± 0.41  | 0.58 ± 0.05  | 0.61 ± 0.03  | 0.74 ± 0.02  | 0.76 ± 0.01   | 0.75 ± 0.02   | 0.78 ± 0.09  |
|                 | Peak Hip Flex (°)       | 27.82 ± 2.48 | 21.24 ± 6.50  | 19.74 ± 1.61 | 23.64 ± 0.09 | 17.43 ± 1.43 | 17.19 ± 0.86 | 18.71 ± 0.41 | 14.40 ± 0.96  | 26.31 ± 0.89  | 21.68 ± 0.48 |
|                 | Peak Hip Ext (°)        | 21.32 ± 1.19 | 22.62 ± 0.52  | 19.82 ± 1.15 | 28.34 ± 1.47 | 17.07 ± 0.81 | 20.51 ± 0.72 | 24.06 ± 0.72 | 19.77 ± 3.31  | 24.03 ± 0.65  | 26.50 ± 1.45 |
|                 | Hip ROM (°)             | 49.14 ± 3.64 | 43.86 ± 6.45  | 39.57 ± 2.49 | 51.98 ± 1.56 | 34.50 ± 1.99 | 37.70 ± 1.47 | 42.77 ± 0.91 | 34.18 ± 4.25  | 50.33 ± 1.22  | 48.17 ± 1.92 |
|                 | Peak Knee Flex (°)      | 18.81 ± 4.00 | 23.75 ± 2.00  | 41.78 ± 1.36 | 48.99 ± 1.56 | 28.93 ± 1.61 | 37.19 ± 0.99 | 28.00 ± 1.32 | 29.46 ± 9.02  | 47.17 ± 1.86  | 50.85 ± 0.33 |
|                 | Peak Knee Ext (°)       | 11.71 ± 1.73 | 13.39 ± 1.37  | 20.82 ± 3.55 | 23.63 ± 2.11 | 13.35 ± 2.79 | 14.19 ± 1.22 | 16.52 ± 0.49 | 17.35 ± 6.89  | 60.56 ± 3.69  | 19.70 ± 0.99 |
|                 | Knee ROM (°)            | 30.53 ± 5.25 | 37.13 ± 3.23  | 62.61 ± 4.12 | 72.62 ± 3.67 | 42.29 ± 3.94 | 51.39 ± 2.18 | 44.53 ± 0.84 | 46.81 ± 15.82 | 107.73 ± 2.21 | 70.56 ± 0.84 |
|                 | Peak Ankle DF           | 9.18 ± 1.17  | 9.63 ± 0.57   | 6.85 ± 1.31  | 5.11 ± 0.35  | 9.03 ± 0.10  | 11.59 ± 0.16 | 12.93 ± 0.16 | 11.48 ± 0.36  | 10.31 ± 1.31  | 9.79 ± 0.20  |

|  |                         |                 |                 |                 |                 |                 |                     |                            |                     |                     |                     |
|--|-------------------------|-----------------|-----------------|-----------------|-----------------|-----------------|---------------------|----------------------------|---------------------|---------------------|---------------------|
|  | (°)                     |                 |                 |                 |                 |                 |                     | 1.5<br>8                   |                     |                     |                     |
|  | Peak<br>Ankle<br>PF (°) | 9.74 ±<br>0.81  | 12.20 ±<br>0.48 | 9.14 ±<br>0.94  | 9.08 ±<br>0.64  | 14.39 ±<br>0.71 | 15.0<br>3 ±<br>0.12 | 14.<br>24<br>±<br>1.2<br>9 | 15.8<br>9 ±<br>0.42 | 15.3<br>4 ±<br>0.43 | 17.2<br>9 ±<br>0.12 |
|  | Ankle<br>ROM<br>(°)     | 18.92 ±<br>1.70 | 21.83 ±<br>0.82 | 15.93 ±<br>1.98 | 14.19 ±<br>0.83 | 23.42 ±<br>0.81 | 26.6<br>3 ±<br>0.24 | 29.<br>17<br>±<br>2.8<br>6 | 26.3<br>7 ±<br>0.67 | 25.6<br>5 ±<br>1.71 | 27.0<br>9 ±<br>0.13 |
|  |                         |                 |                 |                 |                 |                 |                     |                            |                     |                     |                     |

Supplemental Table 1: Mean spatial and kinematic values calculated from 3 middle steps of 3 walking trials of each limb for each participant in seconds (s) and degrees (°). Abbreviations: DF= dorsiflexion; PF= plantarflexion; ROM= range of motion; Flex= flexion; Ext= extension.
